# Supplementary material
Source: Royal Society of Chemistry journal article supplement (doi:10.1039/d6fo00042h)
Supplement: d6fo00042h1.pdf [file d6fo00042h1.pdf]

Supplementary data

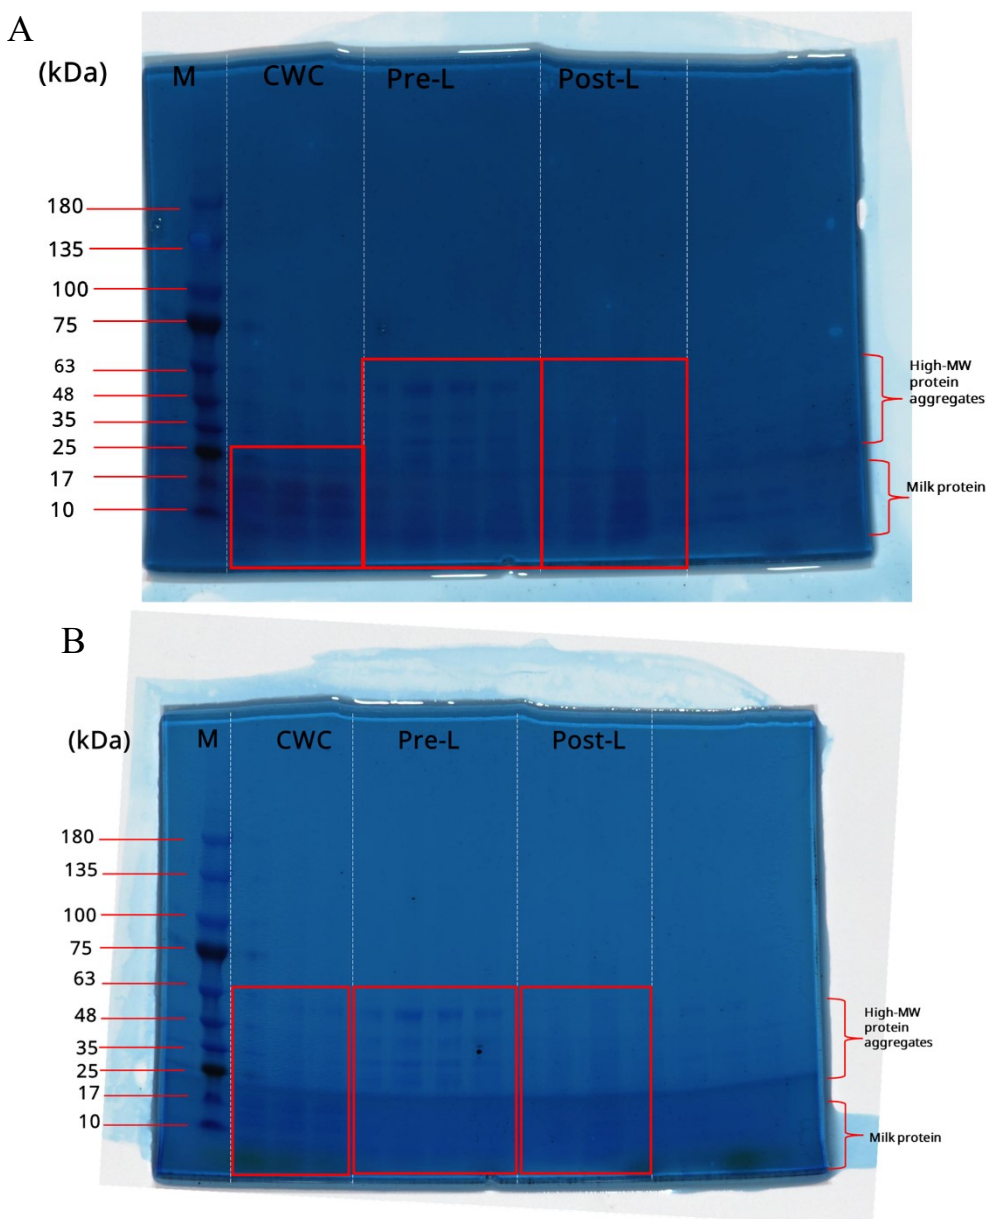

Figure S1. Full, uncropped, and unprocessed SDS-PAGE gel images corresponding to Figure 6: Oral-gastric phase digesta (A) and Intestinal phase digesta (B). Lanes: M, Protein marker; CWC: Control yogurt (0% CLE); Pre-L: yogurt with 2% CLE added pre-fermentation; Post-L: yogurt with 2% CLE added post-fermentation. Major protein bands and molecular weights are indicated. Lane boundaries are delineated with vertical white lines and bands of interest are separated with red boxes.

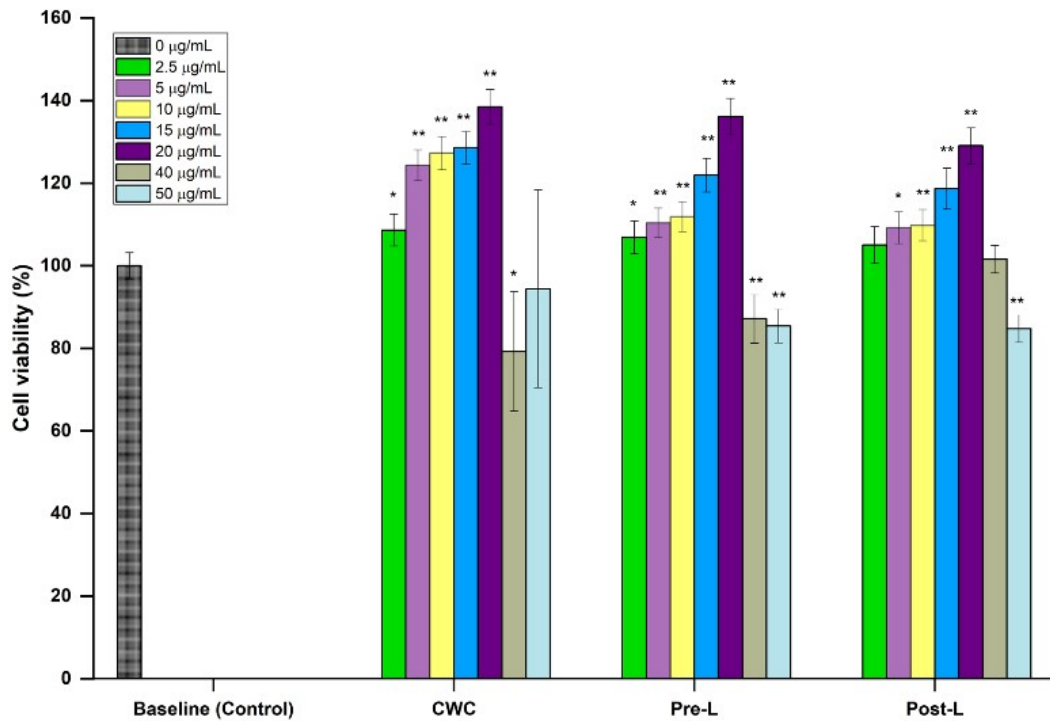

**Figure S2.** Cytotoxicity screening in RAW 264.7 cells to identify a non-cytotoxic concentration.

Cell viability was assessed using a CCK-8 metabolic assay following 18 h of treatment with concentrations ranging from 2.5 to 50 µg/mL. Data are presented as mean ± SD (n=3). Statistical significance was determined by Student's t-test ( $*p < 0.05$ ,  $**p < 0.01$ ) compared to the untreated control. The concentration of 2.5 µg/mL (green bar), which showed the least significant difference in CWC and Pre-L, but none in Post-L, and no cytotoxicity, was selected for all subsequent experiments.

**Table S1. Primer sequences used for quantitative real-time PCR analysis.**

| <b>Gene Symbol</b> | <b>Gene Name</b>                                   | <b>Primer sequence (5' -&gt; 3')</b>                                | <b>Amplicon size</b> | <b>GenBank Accession</b> |
|--------------------|----------------------------------------------------|---------------------------------------------------------------------|----------------------|--------------------------|
| Nrf2               | Nuclear factor erythroid 2-related factor 2 (Nrf2) | F:<br>TTTAGTCAGCGACAGAAGGAC<br><br>R:<br>AGGCATCTTGTTTGGGAATGT<br>G | 227                  | NM_010902                |
| HO-1               | Heme oxygenase 1 (HO-1)                            | F:<br>AGGTACACATCCAAGCCGAGA<br><br>R:<br>CATCACCAGCTTAAAGCCTTC<br>T | 86                   | NM_010442                |
| NQO1               | NAD(P)H quinone dehydrogenase 1                    | F:<br>AGGATGGGAGGTACTCGAATC<br><br>R:<br>TGCTAGAGATGACTCGGAAGG      | 127                  | NM_008706                |
| GAPDH              | Glyceraldehyde-3-phosphate dehydrogenase           | F:<br>AGGTCGGTGTGAACGGATTTG<br><br>R: GGGGTCGTTGATGGCAACA           | 95                   | NM_008084                |

**Table S2. Acidity (pH and TA) of CE-treated and untreated Yoghurts during storage**

| Storage Days | pH                        |                            |                           |
|--------------|---------------------------|----------------------------|---------------------------|
|              | CWC                       | Pre-L                      | Post-L                    |
| <b>1</b>     | 4.44 ± 0.01 <sup>Aa</sup> | 4.45 ± 0.01 <sup>Aa</sup>  | 4.54 ± 0.01 <sup>Ab</sup> |
| <b>7</b>     | 4.19 ± 0.03 <sup>Aa</sup> | 4.21 ± 0.01 <sup>Ba</sup>  | 4.33 ± 0.02 <sup>Ab</sup> |
| <b>14</b>    | 4.22 ± 0.03 <sup>Aa</sup> | 4.24 ± 0.02 <sup>Bab</sup> | 4.29 ± 0.01 <sup>Ab</sup> |
| <b>21</b>    | 3.88 ± 0.03 <sup>Ba</sup> | 4.21 ± 0.02 <sup>Bb</sup>  | 4.23 ± 0.03 <sup>Ab</sup> |

CWC-Control yoghurt (0% CLE), Pre-L: yoghurt treated with 2% CLE pre-fermentation, and post-L: yoghurt treated with 2% CLE post-fermentation. Values are mean ± SD (n = 3). Different capital letters indicate significant differences ( $p < 0.05$ ) within the same treatment across storage times. Different lowercase letters indicate significant differences ( $p < 0.05$ ) between treatments at the same time point.

**Table S3. Repeated-measures ANOVA results for the effect of Time and Treatment on the Degree of Hydrolysis during fermentation.**

|                                                        | df          | F      | p-value |
|--------------------------------------------------------|-------------|--------|---------|
| Source                                                 |             |        |         |
| Within-Subjects Effects (Greenhouse-Geisser Corrected) |             |        |         |
| Time                                                   | (1,99,7.95) | 391.81 | < .001  |
| Time × Treatment                                       | (1,99,7.95) | 7.52   | .015    |
| Between-Subjects Effects                               |             |        |         |
| Treatment                                              | (1, 4)      | 61.37  | .001    |

*Note: Mauchly's Test confirmed violation of sphericity,  $W \approx 0.000$ ,  $p < .001$ .*
